# Supplementary material for: Lifecourse socioeconomic status and type 2 diabetes: the role of chronic inflammation in the English Longitudinal Study of Ageing
Source: PubMed Central journal article supplement (PMC4840327; doi:10.1038/srep24780), 2016-04-22
Supplement: srep24780-s1.pdf [file srep24780-s1.pdf]

**Lifecourse socioeconomic status and type 2 diabetes: the role of chronic inflammation in the English Longitudinal Study of Ageing**

Silvia Stringhini<sup>1</sup>, Paola Zaninotto<sup>2</sup>, Meena Kumari<sup>3</sup>, Mika Kivimaki<sup>2</sup>, G. David Batty<sup>2</sup>

<sup>1</sup> Institute of Social and Preventive Medicine (IUMSP), Lausanne University Hospital, Lausanne, Switzerland

<sup>2</sup> University College London, Department of Epidemiology and Public Health, London, United Kingdom

<sup>3</sup> Institute for Social and Economic Research, University of Essex, Essex

Running head: Socioeconomic status and type 2 diabetes at older ages

SUPPLEMENTARY FILES

**Table S1. Association of lifecourse socioeconomic score with diabetes incidence ANALYSIS STRATIFIED BY GENDER**

|                                                                        | MEN              |     | WOMEN             |     |
|------------------------------------------------------------------------|------------------|-----|-------------------|-----|
|                                                                        | HR (95%CI)       | %Δ  | HR (95%CI)        | %Δ  |
| <b>Model 1:</b> Adjusted for age, sex, ethnicity, prevalent conditions | 2.89 (1.76;4.75) |     | 2.29 (1.36;3.87)  |     |
| <b>Model 2:</b> Model 1 + lifestyle factors                            | 1.63 (0.96;2.76) | -54 | 1.51 (0.86;2.62)  | -51 |
| <b>Model 3:</b> Model 1 + inflammation                                 | 2.23 (1.34;3.69) | -25 | 1.97 (1.16; 3.36) | -18 |
| <b>Model 4:</b> Model 1 + all factors                                  | 1.58 (0.93;2.68) | -57 | 1.45 (0.83; 2.55) | -55 |

Δ: Attenuation; BMI: Body Mass Index; CI: Confidence Interval; CRP: C-reactiv protein; HR: Hazard ratio  
Lifestyle factors include smoking, alcohol intake, physical activity, BMI. Inflammation include fibrinogen and CRP.
